# Supplementary material for: Understanding the Driving Forces That Trigger Mutations in SARS-CoV-2: Mutational Energetics and the Role of Arginine Blockers in COVID-19 Therapy
Source: MDPI journal article supplement (doi:10.3390/v14051029), 2022-05-11
Supplement: s1 [file s1]

Table S1: Distances between RBD Residue/Atom and ACE2 Residue/Atom

| RBD Residue/Atom    | ACE2 Residue/Atom    | Dist [Å] |
|---------------------|----------------------|----------|
| 6lzg_1.b/^Y449/hh   | a_6lzg_1.a/^D38/od1  | 1.837    |
| 6lzg_1.b/^A475/o    | a_6lzg_1.a/^S19/hg   | 1.835    |
| 6lzg_1.b/^N487/hd22 | a_6lzg_1.a/^Q24/oe1  | 2.217    |
| 6lzg_1.b/^G496/o    | a_6lzg_1.a/^K353/hz1 | 2.474    |
| 6lzg_1.b/^Q498/he22 | a_6lzg_1.a/^Q42/oe1  | 1.647    |
| 6lzg_1.b/^T500/hg1  | a_6lzg_1.a/^Y41/oh   | 1.753    |
| 6lzg_1.b/^N501/hd21 | a_6lzg_1.a/^Y41/oh   | 2.36     |
| 6lzg_1.b/^G502/hn   | a_6lzg_1.a/^K353/o   | 1.812    |

| RBD Residue/Atom      | ACE2 Residue/Atom    | Dist [Å] |
|-----------------------|----------------------|----------|
| a_6lzg_1.b/^Y449/hh   | a_6lzg_1.a/^D38/od1  | 1.837    |
| a_6lzg_1.b/^A475/o    | a_6lzg_1.a/^S19/hg   | 1.835    |
| a_6lzg_1.b/^N487/hd22 | a_6lzg_1.a/^Q24/oe1  | 2.217    |
| a_6lzg_1.b/^G496/o    | a_6lzg_1.a/^K353/hz1 | 2.474    |
| a_6lzg_1.b/^Q498/he22 | a_6lzg_1.a/^Q42/oe1  | 1.647    |
| a_6lzg_1.b/^T500/hg1  | a_6lzg_1.a/^Y41/oh   | 1.728    |
| a_6lzg_1.b/^G502/hn   | a_6lzg_1.a/^K353/o   | 1.812    |

Table S2: SARS-CoV-2 variants and dominating mutations

| WHO name | Notable Mutations                                               |
|----------|-----------------------------------------------------------------|
| Alpha    | N501Y, E484K, K417N, P681H, D614G                               |
| Beta     | K417N, E484K                                                    |
| Gamma    | K417N, E484K, D614G                                             |
| Delta    | T478K, L452R, P681R, P614G, E484Q, Δ156-157, R158G, T19R, D950N |
| Epsilon  | L452R                                                           |
| Kappa    | L452R, E484Q, P681R                                             |
| Lambda   | L452Q                                                           |
| Omicron  | E484A, T478K, K417N, N501Y, D614G, P681H, N679K                 |
